# Supplementary material for: Release of bioactive volatiles from supramolecular hydrogels: influence of reversible acylhydrazone formation on gel stability and volatile compound evaporation
Source: Royal Society of Chemistry journal article supplement (doi:10.1039/c0ob01139h), 2011-01-01
Supplement: c0ob01139h.pdf [file c0ob01139h.pdf]

# Release of bioactive volatiles from supramolecular hydrogels: influence of reversible acylhydrazone formation on gel stability and volatile compound evaporation‡

Barbara Buchs (née Levrand),<sup>a</sup> Wolfgang Fieber,<sup>a</sup> Florence Vigouroux-Elie,<sup>b</sup>  
Nampally Sreenivasachary,<sup>c</sup> Jean-Marie Lehn<sup>\*c</sup> and Andreas Herrmann<sup>\*a</sup>

Org. Biomol. Chem., Manuscript ID OB-ART-12-2010-001139

<sup>a</sup> Firmenich SA, Division Recherche et Développement, 1 Route des Jeunes, B.P. 239, CH-1211 Genève 8, Switzerland.

<sup>b</sup> Firmenich SA, Division Parfumerie, 1 Route des Jeunes, B.P. 239, CH-1211 Genève 8, Switzerland.

<sup>10</sup> <sup>c</sup> ISIS, Université de Strasbourg, 8 Allée Gaspard Monge, B.P. 70028, F-67083 Strasbourg Cedex, France.

## Electronic Supplementary Information (ESI)

### General

Commercially available reagents and solvents were used without further purification and reactions were carried out in standard glassware under N<sub>2</sub>. Demineralised water was obtained from a Millipore Synergy 185 water purifier. <sup>1</sup>H- and <sup>13</sup>C-NMR Spectra were recorded at 25°C on a Bruker 400 MHz DPX or 500 MHz Avance spectrometer,  $\delta$  in ppm downfield from Me<sub>4</sub>Si as internal standard, *J* in Hz. Standard pulse sequences and parameters were used for one-dimensional <sup>1</sup>H- and <sup>13</sup>C-spectra and two-dimensional, gradient selected COSY, NOESY, <sup>1</sup>H-, <sup>13</sup>C-HSQC, and <sup>1</sup>H-, <sup>13</sup>C-HMBC spectra, respectively. LC-MS (ESI) measurements were performed on an Agilent 1100 LC-MS system equipped with a Waters Nova-Pak C18 60 Å 4 m (2.1 x 150 mm i.d.) or a Macherey-Nagel Nucleosil C2 (2.0 x 250 mm i.d.) column, eluted at 0.5 mL min<sup>-1</sup> with a gradient of H<sub>2</sub>O and acetonitrile (both containing 0.1% of formic acid) and coupled to a G1946D mass spectrometer. The ionisation source of the mass spectrometer was used with the following parameters: drying gas flow 12 L min<sup>-1</sup>, nebuliser pressure 40 psig, drying gas temperature 350°C, capillary voltage 4000 V (pos.), for direct infusion (200  $\mu$ L min<sup>-1</sup>) the drying gas flow was set at 10 L min<sup>-1</sup> and the nebuliser pressure at 20 psig, fragment ions *m/z* (rel. int. in % of the base peak). Dynamic headspace measurements were carried out with a Perkin Elmer TurboMatrix ATD desorber coupled to a Carlo Erba MFC 500 gas chromatograph equipped with a J&W Scientific DB1 capillary column (30 m, i.d. 0.45 mm, film 0.42  $\mu$ m) and a FID detector. The volatiles were analysed using a two-step temperature gradient starting from 70°C to 130°C at 3°C min<sup>-1</sup> and then going to 260°C at 25°C min<sup>-1</sup>. The injection temperature was at 240°C, the detector temperature at 260°C.

### Synthesis of (3aS,4S,6R,6aR)-6-(2-amino-6-oxo-1,6-dihydro-9H-purin-9-yl)-2,2-dimethyltetrahydrofuro[3,4-D][1,3]dioxole-4-carboxylic acid (**4**)<sup>20</sup>

Acetone and water (1:1, 114 mL) were added to a mixture of 2-amino-9-[(3aR,4R,6R,6aR)-6-(hydroxymethyl)-2,2-dimethyltetrahydrofuro[3,4-D][1,3]dioxol-4-yl]-1,9-dihydro-6H-purin-6-one (7.47 g, 23.1 mmol), [bis(acetoxy)iodo]benzene (BAIB, 16.38 g, 50.9 mmol, 2.2 eq.), 2,2,6,6-tetramethyl-1-piperidinyloxy radical (TEMPO, 0.72 g, 4.6 mmol, 0.2 eq.) and sodium hydrogencarbonate (3.89 g, 46.3 mmol, 2 eq.). The reaction was stirred at r.t. for 6 h, filtered and the residue washed with ether and acetone. Drying under vacuum gave 4.84 g (62%) of a white solid. Concentration of the filtrate and re-filtration gave another 2.26 g (29%) of the compound containing an unknown impurity. IR (neat):  $\tilde{\nu}_{\max}$  3332m (br.), 3224w, 3100w, 2988w, 2935w, 2846w, 2778w, 2737w, 1681m, 1639m, 1582s, 1534m, 1486w, 1459w, 1400m, 1378m, 1174w, 1156w, 1089m, 1058m, 995w, 973w, 936w, 862s, 842w, 816m, 780m, 760m, 741m, 728w, 708w, 682m, 642s, 616w, 608w cm<sup>-1</sup>. <sup>1</sup>H-NMR (400 MHz, DMSO-d<sub>6</sub>):  $\delta$  11.42 (br. s, 1 H), 8.31 (s, 1 H), 6.88 (br. s, 2 H), 5.95 (d, *J* = 2.6, 1 H), 5.10-5.04 (m, 1 H), 5.01-4.94 (m, 1 H), 4.32 (d, *J* = 2.0, 1 H), 1.50 (s, 3 H), 1.30 ppm (s, 3 H). <sup>13</sup>C-NMR (100.6 MHz, DMSO-d<sub>6</sub>):  $\delta$  172.25 (s), 157.04 (s), 153.92 (s), 150.80 (s), 136.51 (d), 116.10 (s), 112.19 (s), 89.33 (d), 87.15 (d), 84.61 (d), 83.93 (d), 26.89 (q), 25.00 ppm (q). MS (ESI): *m/z* 675 ([2M+1]<sup>+</sup>, 4), 340 (3), 339 (17), 338 ([M+1]<sup>+</sup>, 100).

### Synthesis of methyl (2S,3S,4R,5R)-5-(2-amino-6-oxo-1,6-dihydro-9H-purin-9-yl)-3,4-dihydroxytetrahydro-2-furancarboxylate (**5**)<sup>21</sup>

A suspension of **4** (4.84 g, 14.3 mmol) in methanol (190 mL) was cooled to 5°C before thionyl chloride (6.77 mL = 11.1 g, 93.3 mmol, 6.5 eq.) was added dropwise during 10 min. The transparent reaction mixture was left warming to r.t. and stirred for 1 d. The precipitate formed during the reaction was filtered and washed with methanol. Concentration of the filtrate and re-filtration gave a total of 4.10 g (92%) of a white solid. IR (neat):  $\tilde{\nu}_{\max}$  3455w, 3401m, 3299w, 3169m (br.), 3120m, 3047w, 3003w, 2975w, 2955w, 2924w, 2852w, 2817w, 2775w, 2724w, 2674w, 2610w, 2544w, 1823w, 1713s, 1643s, 1601m, 1586s, 1554w, 1536w, 1461m, 1447w, 1438w, 1413w, 1399w, 1381m, 1360m, 1335m, 1316m, 1294w, 1274w, 1249m, 1217m, 1209m, 1170w, 1151m, 1125m, 1103m, 1077s, 1047m, 1027m, 969w, 950w, 918m, 885m, 863m, 819m, 788m, 772m, 760m, 730m, 683m, 667m, 645m, 619m cm<sup>-1</sup>. <sup>1</sup>H-NMR (400 MHz, DMSO-d<sub>6</sub>):  $\delta$  11.64 (br. s, 1 H), 8.90 (s, 1 H), 7.27 (br. s, 2 H), 5.95 (d, *J* = 5.1, 1 H), 4.55-4.50 (m, 2 H), 4.37 (t, *J* = 3.8, 1 H), 3.74 ppm (s, 3 H). <sup>13</sup>C-NMR (100.6 MHz, DMSO-d<sub>6</sub>):  $\delta$  170.85 (s), 155.22 (s), 154.08 (s), 150.20 (s), 135.00 (d), 110.23 (s), 87.81 (d), 82.29 (d), 73.68 (d),

72.95 (d), 52.34 ppm (q).  $^{13}\text{C-NMR}$  (125.8 MHz,  $\text{DMSO-d}_6$ , after addition of 40  $\mu\text{L}$  of 1 M NaOD):  $\delta$  171.04 (s), 156.93 (s), 153.88 (s), 151.94 (s), 135.40 (d), 116.41 (s), 86.15 (d), 82.31 (d), 73.58 (d), 73.14 (d), 52.49 ppm (q). MS (ESI):  $m/z$  623 ( $[\text{2M}+1]^+$ , 4), 314 (3), 313 (15), 312 (100).

**Synthesis of (2S,3S,4R,5R)-5-(2-amino-6-oxo-1,6-dihydro-9H-purin-9-yl)-3,4-dihydroxytetrahydro-2-furancarbohydrazide (1)<sup>10</sup>**

5 A suspension of **5** (3.75 g, 12.1 mmol) and hydrazine hydrate (51% in water, 1.47 mL = 1.51 g, 24.0 mmol) in ethanol (120 mL) was heated under reflux overnight. After cooling to r.t., the reaction mixture was filtered to give 3.62 g of a white solid still containing *ca.* 30 mol-% of the starting methyl ester. The product was re-suspended in ethanol (120 mL), hydrazine hydrate (1.42 mL = 1.46 g, 23.1 mmol) was added, and the mixture heated at reflux for another 3 d. After cooling to r.t., the reaction mixture was filtered to give 3.23 g (86%) of a white solid. M.p.: 217.1-218.7°C. UV/Vis (ethanol):  $\lambda$  ( $\epsilon$ ) 321 (sh, 710), 285 (sh, 3000), 274 (sh, 4400), 255 (6100), 249 (sh, 5900),  
10 203 nm (7700). IR (neat):  $\tilde{\nu}_{\text{max}}$  3487w, 3449w, 3314w, 3243w, 3169w (br.), 3109w, 2989w (br.), 2932w, 2870w, 2743w, 1761w, 1709s, 1633s, 1609m, 1585s, 1557m, 1542m, 1495m, 1445w, 1423w, 1410w, 1380m, 1359m, 1340m, 1312m, 1297w, 1280w, 1248m, 1228m, 1206w, 1163m, 1128m, 1081m, 1054s, 1024m, 1001m, 962m, 926m, 884m, 843m, 826m, 781m, 751m, 686s, 674m, 653m, 607m  $\text{cm}^{-1}$ .  $^1\text{H-NMR}$  (500 MHz,  $\text{DMSO-d}_6$ ):  $\delta$  11.01 (br. s, 1 H), 10.62 (br. s, 1 H), 7.96 (s, 1 H), 6.65 (s, 2 H), 5.79 (d,  $J = 7.7$ , 1 H), 5.74 (m, 1 H), 5.59 (m, 1 H), 4.46 (m, 1 H), 4.34 (d,  $J = 1.0$ , 1 H), 4.11 (br. d,  $J = 3.8$ , 1 H), 4.0-2.8 ppm (br. m, 2 H).  $^1\text{H-NMR}$  (400 MHz,  $\text{D}_2\text{O} +$   
15 NaOD):  $\delta$  8.15 (s, 1 H), 5.70 (d,  $J = 6.6$ , 1 H), 4.69 (dd,  $J = 5.5, 0.7$ , 1 H), 4.29-4.25 (m, 1 H), 4.25-4.21 ppm (m 1 H).  $^{13}\text{C-NMR}$  (125.8 MHz,  $\text{DMSO-d}_6$ ):  $\delta$  168.63 (s), 156.58 (s), 153.45 (s), 149.88 (s), 137.08 (d), 117.25 (d), 87.46 (d), 84.01 (d), 73.00 (d), 72.15 ppm (d).  $^{13}\text{C-NMR}$  (100.6 MHz,  $\text{D}_2\text{O} + \text{NaOD}$ ):  $\delta$  188.62 (s), 167.51 (s), 154.76 (s), 151.89 (s), 139.41 (d), 120.44 (s), 90.78 (d), 88.79 (d), 78.49 (d), 76.27 ppm (d). MS (ESI):  $m/z$  312 ( $[\text{M}+1]^+$ , 8), 299 (12), 298 (100). Please note that in  $\text{D}_2\text{O}/\text{NaOD}$  the compound decomposes to form **23**.

20 **Synthesis of (2S,3S,4R,5R)-5-(2-amino-6-oxo-1,6-dihydro-9H-purin-9-yl)-3,4-dihydroxytetrahydro-2-furancarboxylic acid (23)<sup>25</sup>**

A solution of **4** (0.60 g, 1.8 mmol) in a 1:1 mixture of formic acid and water (40 mL) was heated at 80°C for 1.5 h. After cooling to r.t., the mixture was concentrated, taken up in water and re-concentrated until the smell of formic acid disappeared (5-6 cycles) to give 0.51 g (96%) of a white solid, still containing some formic acid. IR (neat):  $\tilde{\nu}_{\text{max}}$  3429w, 3404w, 3118m (br.), 2776w, 2696w, 2165w, 1884w (br.), 1739m, 1686m, 1658m, 1591s, 1543m, 1477m, 1373m (br.), 1319m (br.), 1242w, 1213w, 1200w, 1173m, 1127m, 1115m, 1084m,  
25 1053s, 942m, 880m, 848w, 810m, 778m, 766w, 728w, 686m, 671w, 659w, 629m, 604m  $\text{cm}^{-1}$ .  $^1\text{H-NMR}$  (400 MHz,  $\text{D}_2\text{O}$ ):  $\delta$  8.27 (s, 1 H), 5.99 (d,  $J = 6.6$ , 1 H), 4.65 (dd,  $J = 6.6, 2.0$ , 1 H), 4.55-4.47 ppm (m, 2 H).  $^1\text{H-NMR}$  (400 MHz,  $\text{D}_2\text{O} + \text{NaOD}$ ):  $\delta$  8.13 (s, 1 H), 5.79 (d,  $J = 7.2$ , 1 H), 4.60 (dd,  $J = 7.2, 2.3$ , 1 H), 4.40 (d,  $J = 2.0$ , 1 H), 4.29 ppm (dd,  $J = 4.8, 2.0$ , 1 H).  $^{13}\text{C-NMR}$  (100.6 MHz,  $\text{D}_2\text{O}$ ):  $\delta$  179.27 (s), 172.63 (s), 161.71 (s), 156.90 (s), 140.79 (d), 118.78 (s), 89.47 (d), 87.60 (d), 77.05 (d), 76.69 ppm (d).  $^{13}\text{C-NMR}$  (100.6 MHz,  $\text{D}_2\text{O} + \text{NaOD}$ ):  $\delta$  180.50 (s), 171.13 (s), 164.15 (s), 155.15 (s), 139.16 (d), 120.35 (s), 89.97 (d), 87.81 (d), 78.64 (d), 78.19 ppm  
30 (d). HRMS (ESI):  $m/z$  calc. for  $\text{C}_{10}\text{H}_{12}\text{N}_5\text{O}_6^+$ : 298.0782 ( $[\text{M}+\text{H}]^+$ ), found: 298.0759 ( $[\text{M}+\text{H}]^+$ ).

**Dynamic headspace analysis**

**Table S1** (numerical data for Figure 8). Average headspace concentrations (in ng/L air) and standard deviation (in brackets) measured for the release of a mixture of two volatile carbonyl compounds from hydrogels prepared with hydrogelator **1** (average values of three measurements).

5

| Headspace concentration [ng L <sup>-1</sup> ] of             |                  |                 |                  |                 |                 |                |
|--------------------------------------------------------------|------------------|-----------------|------------------|-----------------|-----------------|----------------|
| ( <i>R</i> )-Citronellal ( <b>14</b> )<br>in the presence of | 1 d              | 2 d             | 4 d              | 7 d             | 9 d             | 15 d           |
| Furfural ( <b>15</b> )                                       | 33.9<br>(17.8)   | 31.2<br>(20.6)  | 30.3<br>(21.9)   | 22.4<br>(16.3)  | 18.8<br>(14.9)  | 11.0<br>(3.8)  |
| Benzaldehyde ( <b>16</b> )                                   | 25.0<br>(8.5)    | 29.6<br>(14.7)  | 27.6<br>(17.5)   | 20.9<br>(14.0)  | 15.6<br>(11.9)  | 8.0<br>(6.2)   |
| 4-Methylacetophenone ( <b>17</b> )                           | 44.8<br>(12.1)   | 31.8<br>(19.0)  | 31.5<br>(20.0)   | 21.5<br>(15.6)  | 16.7<br>(12.5)  | 8.4<br>(6.3)   |
| Furfural ( <b>15</b> )<br>in the presence of                 |                  |                 |                  |                 |                 |                |
| ( <i>R</i> )-Citronellal ( <b>14</b> )                       | 18.4<br>(19.1)   | 14.5<br>(10.0)  | 10.8<br>(8.8)    | 8.6<br>(0.1)    | 8.2<br>(2.8)    | 6.6<br>(0.2)   |
| Benzaldehyde ( <b>16</b> )                                   | 25.4<br>(31.0)   | 4.8<br>(1.1)    | 7.0<br>(3.9)     | 6.1<br>(1.7)    | 4.4<br>(0.7)    | 4.3<br>(2.0)   |
| 4-Methylacetophenone ( <b>17</b> )                           | 73.1<br>(63.5)   | 38.5<br>(44.5)  | 20.6<br>(22.8)   | 14.1<br>(10.3)  | 10.4<br>(6.7)   | 5.8<br>(3.6)   |
| Benzaldehyde ( <b>16</b> )<br>in the presence of             |                  |                 |                  |                 |                 |                |
| ( <i>R</i> )-Citronellal ( <b>14</b> )                       | 10.8<br>(0.2)    | 12.4<br>(3.8)   | 10.7<br>(2.1)    | 11.3<br>(3.3)   | 11.1<br>(2.8)   | 9.3<br>(0.4)   |
| Furfural ( <b>15</b> )                                       | 12.9<br>(2.2)    | 11.2<br>(1.2)   | 11.4<br>(3.1)    | 15.2<br>(1.1)   | 13.0<br>(1.8)   | 11.1<br>(2.4)  |
| 4-Methylacetophenone ( <b>17</b> )                           | 10.7<br>(1.7)    | 10.2<br>(2.4)   | 11.5<br>(2.2)    | 12.7<br>(4.4)   | 11.7<br>(3.4)   | 11.0<br>(2.4)  |
| 4-Methylacetophenone ( <b>17</b> )<br>in the presence of     |                  |                 |                  |                 |                 |                |
| ( <i>R</i> )-Citronellal ( <b>14</b> )                       | 336.1<br>(86.4)  | 255.6<br>(27.3) | 301.0<br>(151.0) | 194.3<br>(89.4) | 149.3<br>(50.8) | 82.4<br>(25.3) |
| Furfural ( <b>15</b> )                                       | 226.9<br>(157.2) | 259.5<br>(21.6) | 216.9<br>(8.9)   | 147.0<br>(5.3)  | 117.8<br>(12.8) | 62.0<br>(17.5) |
| Benzaldehyde ( <b>16</b> )                                   | 221.1<br>(68.0)  | 176.5<br>(12.4) | 173.1<br>(15.6)  | 131.9<br>(20.7) | 110.2<br>(14.0) | 69.2<br>(11.5) |
